# Supplementary material for: Spliceosomal introns in Trichomonas vaginalis revisited
Source: PubMed Central journal article supplement (PMC6260720; doi:10.1186/s13071-018-3196-7), 2018-11-27
Supplement: 13071_2018_3196_MOESM1_ESM.pdf [file 13071_2018_3196_MOESM1_ESM.pdf]

| No. | Gene ID     | Forward Primer Sequence (5' – 3') | Reverse Primer Sequence (5' – 3') | Intron Size (bp) | gDNA Product Length (bp) | cDNA product size (bp), if intron is spliced out | Notes   |
|-----|-------------|-----------------------------------|-----------------------------------|------------------|--------------------------|--------------------------------------------------|---------|
| 1   | TVAG_014960 | GGCAAGCATGTTTAAAGGTGT             | GGTGAAATTGCCGAGTCTTT              | 81               | 343                      | 262                                              |         |
| 2   | TVAG_043580 | tcagaatttagtgcgATGAGC             | AATCTTCATAGCACCGATGACC            | 25               | 126                      | 101                                              | a       |
| 3   | TVAG_045310 | GATACTGCGAAGTCAAGGAAGG            | GCTCAACACGTGTGAAGAGTTC            | 104              | 691                      | 587                                              | b       |
| 4   | TVAG_056030 | CTGGAAAGAATATGGCAAGA              | TCTGAGTAATCTGCGTGTCCAA            | 25               | 120                      | 95                                               |         |
| 5   | TVAG_066220 | TCAATCGAACAAGGTGCTACTC            | ACATCTGGCTGGGTGTAAAC              | 751              | 1574                     | 823                                              | b, h    |
| 6   | TVAG_089630 | GGTTGGCTCGAACGTAAGTT              | TGTGCATTCTTCATCTTTCC              | 25               | 124                      | 99                                               |         |
| 7   | TVAG_107710 | CAACTTCCAGTCATTGTTCCA             | CTGATTTGCTGTGTTGCTGT              | 12               | 107                      | 95                                               |         |
| 8   | TVAG_110580 | CATACAGGGCTTCCCAAGAA              | ACGCATATGCTCCAGAATC               | 127              | 497                      | 370                                              |         |
| 9   | TVAG_115540 | ACTGGGATTCTCCATACTACG             | AGGCCACCAGTTTGTTCCTAAG            | 111              | 413                      | 302                                              | c, h    |
| 10  | TVAG_126240 | CTTCCTAATGGAAACCTTGACG            | CATCGTTGGAGGGTAAATAGGA            | 99               | 527                      | 428                                              |         |
| 11  | TVAG_130170 | <u>GCATGCAGTCCAAAAATTCA</u>       | <u>gcctcgatcttagtctat</u>         | 25               | 198                      | 173                                              | d, e    |
| 12  | TVAG_134480 | ATGTCAGGTTGGCTCGAACG              | GCTGGGTAATTTCCATTTCAGA            | 25               | 161                      | 136                                              |         |
| 13  | TVAG_193820 | ATACCTCCACAACCAGGTTAC             | CATTCTGGCTTACCCATTG               | 36               | 118                      | 82                                               |         |
| 14  | TVAG_203580 | AGCGTGGGGAGCTGAATTTGG             | CTGCTATTCAATAGAATGTCAATGAACTG     | 25               | 161                      | 136                                              | h       |
| 15  | TVAG_217460 | CAGAAGGAGTTGAATGGAAATG            | GCGACATGCATCAAAGTTAATC            | 72               | 185                      | 113                                              |         |
| 16  | TVAG_242770 | GGCGTGAGAACATTAATGAAG             | AAGCGTGGGATCTATAACAGA             | 25               | 134                      | 109                                              |         |
| 17  | TVAG_249380 | AAGAAGAAAACCAGCGCAAA              | GCGCTTAGCTTCTCCTCAG               | 804              | 1177                     | 373                                              | h       |
| 18  | TVAG_296070 | gaagttgccgaactcaagaa              | gctccttaagcttctctcg               | 51               | 157                      | 106                                              | c, d, h |
| 19  | TVAG_306990 | GTATCCTTGCCAAATCCTTCTG            | ACAGCTCCGAAATCAACTAGC             | 93               | 510                      | 417                                              |         |
| 20  | TVAG_324910 | TCTTTCAGGCAGAAACCTCAGA            | TATCAGCTCTTTGCTTTGCT              | 25               | 120                      | 95                                               |         |
| 21  | TVAG_347440 | TCCAACAGGCCAATTACTATC             | GTAAGCACCTGTGGTGGAT               | 36               | 142                      | 106                                              | c, h    |
| 22  | TVAG_350500 | AGTTATTCGCGGTCAGCAGT              | CGGTGGATGAGGTAATGGAC              | 114              | 423                      | 309                                              |         |
| 23  | TVAG_383350 | atccATGACTGCTAATGA                | CAGAGAACATATCTCCGCCAAA            | 25               | 139                      | 114                                              | a       |
| 24  | TVAG_416520 | CTGCTTCAGTTTTCCGATCA              | TGTCCTCGATATCAAGAGTTC             | 26               | 118                      | 92                                               |         |
| 25  | TVAG_442350 | AAGGACTATCCGGAAGTGATGA            | TGAGGCCAACTTAGATCCTTT             | 64               | 168                      | 104                                              | h       |
| 26  | TVAG_454570 | GATGAAATCTTCGTTGCTCCAT            | GGTGTAGTGTGAGCTCCCTTC             | 291              | 827                      | 536                                              |         |
| 27  | TVAG_455320 | ACTTGGAATCGGTGGAAGAG              | CGATCATCTGGGAGTTGACT              | 18               | 108                      | 90                                               |         |
| 28  | TVAG_037940 | TCTCCATCAAGTCAAACCTTCTG           | TGTTGATGGTTTTCCAAGATTTAAGC        | 66               | 255                      | 189                                              |         |
| 29  | TVAG_085780 | TTCTCTGCTTTTGAAGTTCGATG           | GGTTACCAACACTGCCTGAAAT            | 67               | 413                      | 346                                              | g       |
| 30  | TVAG_115550 | aggccaccagttgttctaaag             | accaaaactgggtttctcttat            | 112              | 307                      | 195                                              | d, h    |
| 31  | TVAG_125100 | CGATAAAGTAGCGCAAGGTCAT            | GGGAGAGTCTTCAAAAATCCT             | 105              | 407                      | 302                                              | g, h    |
| 32  | TVAG_148640 | TTACTTGCAGACTTCGGTTTTG            | CTCGTCAGAGACATCGTCAAAG            | 93               | 354                      | 261                                              |         |
| 33  | TVAG_176980 | TCACAGCAGCATTATCAAGA              | CCTGACAAGACTTATTGAAAGACC          | 59               | 278                      | 219                                              |         |
| 34  | TVAG_178900 | GAGCAGATTCAATCATACCAAG            | <u>ccttgagcatCTACTGTATGTT</u>     | 43               | 172                      | 129                                              | a       |
| 35  | TVAG_198230 | GCAGGAATGCGTCATACAAC              | CTGCCACCATGAGTTAGTCCTT            | 84               | 200                      | 116                                              |         |
| 36  | TVAG_225200 | CAGTGTCCACCACAACCTA               | TACATCGAGCACAAGGGTAA              | 76               | 248                      | 172                                              |         |
| 37  | TVAG_264700 | GTGGTATGCAGATTTTCGTCAA            | CCTTTTGGATGGAGTAGTCCCTG           | 228              | 423                      | 195                                              | h       |
| 38  | TVAG_288660 | <u>TGAGTCCAT</u> ctaacatcgaa      | <u>cagtgaggagctcatctgat</u>       | 25               | 128                      | 103                                              | d, e    |
| 39  | TVAG_337250 | TAACCAGGGCTTTGGACAAC              | ATCCTTGGTTAGCTGGCTGT              | 51               | 158                      | 107                                              | g       |
| 40  | TVAG_355610 | CAGAATCAGAACCAATTCAACG            | GAAGCAGGTGGAGGATTAGAGA            | 40               | 179                      | 139                                              |         |
| 41  | TVAG_368250 | ATCAAGCATGTTAATGCTGGCA            | ATGTCATAAaggegttaagt              | 35               | 169                      | 134                                              | d, e    |
| 42  | TVAG_388620 | GGTTCTTACCCTTTAGGTGTGCG           | TCGGCAAAAATCTGTATCTTCTG           | 94               | 351                      | 257                                              |         |
| 43  | TVAG_410120 | tccatttgacccttgaat                | gtgcttagcattcaaaaac               | 25               | 201                      | 177                                              | d       |
| 44  | TVAG_411060 | CAAAGCACAAGAGAGAAGTTGC            | GTTTGGGTTTTACACAGACAAT            | 529              | 915                      | 386                                              |         |
| 45  | TVAG_413420 | TGATAGCTCTACGCAAGAAGCA            | AACCGTAATACGTGGCTGTGTA            | 68               | 160                      | 92                                               |         |
| 46  | TVAG_416890 | ATCGAGATGTGACAGTAGTC              | caacactacattccagaatgc             | 1307             | 1740                     | 433                                              | d       |
| 47  | TVAG_478810 | GGCTAAAGAAGCTGCTGAAAAG            | GCGTTTCTTGATTTCTTCTGCT            | 489              | 1128                     | 639                                              |         |
| 48  | TVAG_479870 | CAAGACCAAGACTTTCCAATGA            | tctgagtacttggccatacc              | 40               | 199                      | 159                                              | a       |
| 49  | TVAG_020880 | CAAAGAAGCCCAAGAAGTACTGACT         | GAGGAGGACATTGTCTGGTTTC            | 196              | 686                      | 490                                              |         |
| 50  | TVAG_053820 | GATAGCTGACTTCGGTTTTGCT            | CGTTGTGGTCTAACTTTCACG             | 110              | 541                      | 431                                              | g       |
| 51  | TVAG_065500 | ACAGAATCAAGATTGCCGACTT            | AAGATGGGTGTATCGGTGTAGG            | 134              | 536                      | 402                                              |         |
| 52  | TVAG_087980 | CCAGAGAAACATCGTGGTGATA            | CGTCAGGAGGATCATAAAATGG            | 78               | 193                      | 115                                              |         |
| 53  | TVAG_110020 | AATCCATTTCTCGGCTACAGAA            | CGGTGGTGGCTAGATATTGTTA            | 91               | 355                      | 264                                              |         |
| 54  | TVAG_147850 | GGCAGGAAAATACGATGAAAAC            | CGAAAAGAAAGCATTGGAAGAGT           | 68               | 256                      | 188                                              |         |
| 55  | TVAG_327510 | GGTAAATGGAGTCCAGCAGAGA            | GATAACGCTGCTGTCAAGAATG            | 174              | 592                      | 418                                              |         |
| 56  | TVAG_390460 | CGACACGTTTCGTTACCATATTC           | AATCTGCGTGAGGATCAGAAAC            | 70               | 229                      | 159                                              | g       |
| 57  | TVAG_432870 | AAACAGAGCAGCTGTAACAG              | TACCTGGTTGTTCTGGCT                | 2297             | 2422                     | 125                                              | h       |
| 58  | TVAG_458560 | CTTGTAGCTTCAGCTGGTATCG            | GCAAGAGGGTAGAAAATGTTTGG           | 1048             | 1507                     | 459                                              | h       |
| 59  | TVAG_460790 | TCTTCGTCATCCTCATGTTGTC            | TTACTTCCACCACCAAAAGA              | 67               | 180                      | 113                                              | g       |
| 60  | TVAG_525530 | ACAGTTCAAAAACACTGCACCAC           | TATCTGAACTTCTCCTGTGGA             | 405              | 552                      | 147                                              | f       |
| 61  | TVAG_593670 | AACAAGTCCATCCTTTGGAAAC            | CCCCATCTCATTGTAGTTCC              | 290              | 427                      | 137                                              |         |
| 61  | TVAG_593670 | TAACCAGCCTACTGAGCAGA              | <u>agtrTTACTCATGTTGAATG</u>       | 16               | 108                      | 92                                               | e       |

Notes: <sup>a</sup>One of the primers contains nucleotides from the UTR (lower-case); <sup>b</sup>The putative intron region contains undetermined nucleotide 'N'; <sup>c</sup>Alternative splicing was predicted on the gene; <sup>d</sup>The entire putative intron is located in UTR; <sup>e</sup>One of the primers includes nucleotides outside the mRNA (underlined); <sup>f</sup>The gene may contain 2 introns, hence 2 sets of primers were designed; <sup>g</sup>No amplicons were found under the normal PCR conditions but after optimisation (annealing temperature, polymerase and/or buffer) the target fragment was amplified; <sup>h</sup>no amplification or only non-specific amplicons were produced even after PCR optimisation (as described in methods).
