# Supplementary material for: Spliceosomal introns in Trichomonas vaginalis revisited
Source: PubMed Central journal article supplement (PMC6260720; doi:10.1186/s13071-018-3196-7), 2018-11-27
Supplement: 13071_2018_3196_MOESM2_ESM.pdf [file 13071_2018_3196_MOESM2_ESM.pdf]

| No. | Original Gene Name | Current Gene ID at TrichDB | Reference                             |
|-----|--------------------|----------------------------|---------------------------------------|
| 1   | PAP (94)           | TVAG_388620                | Vanacova <i>et al.</i><br>(2005) [15] |
| 2   | Cent (116)         | None                       |                                       |
| 3   | Cent (122)         | None                       |                                       |
| 4   | Cent (127)         | TVAG_110580                |                                       |
| 5   | Scp (67)           | TVAG_460790                |                                       |
| 6   | Scp (70)           | TVAG_390460                |                                       |
| 7   | Scp (76)           | TVAG_225200                |                                       |
| 8   | Taf6 (81)          | TVAG_014960*               |                                       |
| 9   | Taf6 (91)          | TVAG_110020                |                                       |
| 10  | STK (93)           | TVAG_148640                |                                       |
| 11  | STK (70)           | None                       |                                       |
| 12  | STK (78)           | TVAG_087980                |                                       |
| 13  | STK (59)           | TVAG_176980                |                                       |
| 14  | STK (68)           | TVAG_413420                |                                       |
| 15  | STK (105)          | TVAG_125100                |                                       |
| 16  | STK (99)           | TVAG_126240                |                                       |
| 17  | STK (110)          | TVAG_053820                |                                       |
| 18  | STK (114)          | TVAG_350500                |                                       |
| 19  | STK (134)          | TVAG_065500                |                                       |
| 20  | STK (196)          | TVAG_020880                |                                       |
| 21  | 908787             | None                       |                                       |
| 22  | 924721             | None                       |                                       |
| 23  | 920443             | TVAG_085780                |                                       |
| 24  | 918654             | None                       |                                       |
| 25  | 919336             | None                       |                                       |
| 26  | 923879             | TVAG_198230                |                                       |
| 27  | 922157             | None                       |                                       |
| 28  | 899749             | None                       |                                       |
| 29  | 910641             | None                       |                                       |
| 30  | 922300             | None                       |                                       |
| 31  | 924085             | None                       |                                       |
| 32  | 891036             | None                       |                                       |
| 33  | 920747             | None                       |                                       |
| 34  | 845470             | None                       |                                       |
| 35  | 921979             | None                       |                                       |
| 36  | 858605             | None                       |                                       |
| 37  | 924111             | None                       |                                       |
| 38  | 918865             | None                       |                                       |
| 39  | 923921             | None                       |                                       |
| 40  | 924029             | None                       |                                       |
| 41  | 921720             | None                       |                                       |
| 42  | TvRab1a            | TVAG_383350                | Deng <i>et al.</i> (2008)<br>[16]     |

*\*The nucleotides of the flanking exons of Taf6(81) should be 'tagc/aga' as per TrichDB instead of 'tagc/aaca' as reported in the original reference [15].*
