# Supplementary material for: Spliceosomal introns in Trichomonas vaginalis revisited
Source: PubMed Central journal article supplement (PMC6260720; doi:10.1186/s13071-018-3196-7), 2018-11-27
Supplement: 13071_2018_3196_MOESM4_ESM.pdf [file 13071_2018_3196_MOESM4_ESM.pdf]

| Genomic Segment ID       | Previous ID by Vanacova et al [15] <sup>a</sup> | Protein-coding gene ID, if annotated by TrichDB <sup>b</sup> | Intron validated in Fig S1? <sup>c</sup> |
|--------------------------|-------------------------------------------------|--------------------------------------------------------------|------------------------------------------|
| DS113189:290662-290745:r | 919336                                          | Not annotated                                                | No                                       |
| DS113190:59406-59490:f   | 923879                                          | TVAG_198230                                                  | Yes                                      |
| DS113198:189344-189471:f | Cent (127)                                      | TVAG_110580                                                  | Yes                                      |
| DS113198:45986-46077:f   | Taf6 (91)                                       | TVAG_110020                                                  | Yes                                      |
| DS113198:72036-72138:r   | 922300                                          | Not annotated                                                | No                                       |
| DS113200:12132-12328:r   | STK (196)                                       | TVAG_020880                                                  | Yes                                      |
| DS113209:193807-193920:r | 858605                                          | Not annotated                                                | No                                       |
| DS113216:206121-206256:r | 899749                                          | Not annotated                                                | No                                       |
| DS113218:51116-51218:f   | None                                            | Not annotated                                                | No                                       |
| DS113224:8624-8700:r     | Scp (76)                                        | TVAG_225200                                                  | Yes                                      |
| DS113249:133470-133533:r | 924721                                          | Not annotated                                                | No                                       |
| DS113267:78748-78815:r   | Scp (67)                                        | TVAG_460790                                                  | Yes                                      |
| DS113269:100642-100736:f | PAP (94)                                        | TVAG_388620                                                  | Yes                                      |
| DS113276:160463-160563:f | None                                            | Not annotated                                                | No                                       |
| DS113279:161942-162045:f | None                                            | Not annotated                                                | No                                       |
| DS113292:26357-26461:r   | 924085                                          | Not annotated                                                | No                                       |
| DS113329:77767-77886:r   | 924111                                          | Not annotated                                                | No                                       |
| DS113356:92090-92150:r   | 908787                                          | Not annotated                                                | No                                       |
| DS113357:56818-56917:r   | STK (99)                                        | TVAG_126240                                                  | Yes                                      |
| DS113364:87506-87622:f   | Cent (116)                                      | Not annotated                                                | No                                       |
| DS113375:81424-81555:f   | 924029                                          | Not annotated                                                | No                                       |
| DS113398:99395-99500:f   | STK (105)                                       | TVAG_125100                                                  | Yes                                      |
| DS113431:27837-27952:f   | 922157                                          | Not annotated                                                | No                                       |
| DS113472:4998-5105:f     | None                                            | Not annotated                                                | No                                       |
| DS113477:61397-61511:r   | STK (114)                                       | TVAG_350500                                                  | Yes                                      |
| DS113480:48744-48814:r   | Scp (70)                                        | TVAG_390460                                                  | Yes                                      |
| DS113550:72375-72447:r   | None                                            | TVAG_217460                                                  | Yes                                      |
| DS113561:60331-60444:f   | None                                            | Not annotated                                                | No                                       |
| DS113572:54036-54147:r   | 921979                                          | Not annotated                                                | No                                       |
| DS113577:26893-27023:r   | 923921                                          | Not annotated                                                | No                                       |
| DS113607:10491-10620:r   | 918865                                          | Not annotated                                                | No                                       |
| DS113624:21306-21384:r   | STK (78)                                        | TVAG_087980                                                  | Yes                                      |
| DS113672:49592-49662:r   | STK (70)                                        | Not annotated                                                | No                                       |
| DS113675:24387-24455:r   | STK (68)                                        | TVAG_413420                                                  | Yes                                      |
| DS113680:30508-30674:f   | STK (59)                                        | TVAG_176980                                                  | Yes                                      |
| DS113755:29856-29949:f   | STK (93)                                        | TVAG_148640                                                  | Yes                                      |
| DS113774:40351-40476:f   | Taf6 (81)                                       | TVAG_014960                                                  | Yes                                      |
| DS113785:34279-34389:f   | STK (110)                                       | TVAG_053820                                                  | Yes                                      |
| DS113789:42043-42143:r   | 910641                                          | Not annotated                                                | No                                       |
| DS113792:26028-26111:f   | 918654                                          | Not annotated                                                | No                                       |
| DS113880:26278-26368:r   | None                                            | Not annotated                                                | No                                       |
| DS113888:20779-20901:r   | Cent (122)                                      | Not annotated                                                | No                                       |
| DS113891:23458-23590:r   | 921720                                          | Not annotated                                                | No                                       |
| DS114021:9497-9590:r     | None                                            | TVAG_306990                                                  | Yes                                      |
| DS114056:23850-23918:r   | None                                            | TVAG_147850                                                  | Yes                                      |
| DS114155:8502-8612:f     | 845470                                          | Not annotated                                                | No                                       |
| DS114355:14790-14894:r   | 891036                                          | Not annotated                                                | No                                       |
| DS114409:6762-6866:f     | None                                            | Not annotated                                                | No                                       |
| DS114439:11009-11076:f   | 920443                                          | TVAG_085780                                                  | Yes                                      |
| DS114995:3256-3363:r     | 920747                                          | Not annotated                                                | No                                       |
| DS115094:4588-4722:r     | STK (134)                                       | TVAG_065500                                                  | Yes                                      |
| DS120697:570-672:r       | 922300                                          | Not annotated                                                | No                                       |

Notes: <sup>a</sup>The old segments, previously described [15], are shown with their original gene ID where applicable in this column. <sup>b</sup>Segments that are located in protein-coding genes were noted with the TrichDB ID where applicable in this column. <sup>c</sup>This column indicates if introns were experimentally validated as per Additional file 3: Figure S1.
