# Supplementary material for: Spliceosomal introns in Trichomonas vaginalis revisited
Source: PubMed Central journal article supplement (PMC6260720; doi:10.1186/s13071-018-3196-7), 2018-11-27
Supplement: 13071_2018_3196_MOESM5_ESM.pdf [file 13071_2018_3196_MOESM5_ESM.pdf]

| Genomic Segment ID                         | Previous ID by Deng et al [16] | Protein-coding gene ID, if annotated by TrichDB <sup>b</sup> | Intron validated in Fig S1? <sup>c</sup> |
|--------------------------------------------|--------------------------------|--------------------------------------------------------------|------------------------------------------|
| DS113190:335792-335817:r                   | None                           | Not annotated                                                | No                                       |
| DS113212:132822-132847:r                   | None                           | Not annotated                                                | No                                       |
| DS113215:39171-39196:r                     | None                           | Not annotated                                                | No                                       |
| DS113232:135446-135471:r                   | None                           | Not annotated                                                | No                                       |
| DS113276:50161-50186:r                     | None                           | Not annotated                                                | No                                       |
| DS113305:53361-53386:f                     | None                           | Not annotated                                                | No                                       |
| <b>DS113379:86879-86904:r <sup>d</sup></b> | None                           | <b>TVAG_269270</b>                                           | No                                       |
| DS113384:61202-61227:r                     | None                           | Not annotated                                                | No                                       |
| DS113419:42845-42870:f                     | None                           | TVAG_056030                                                  | Yes                                      |
| DS113459:19860-19886:f                     | None                           | TVAG_416520                                                  | Yes                                      |
| DS113486:15534-15559:r                     | None                           | TVAG_203580                                                  | Yes                                      |
| DS113505:34256-34281:r                     | None                           | TVAG_043580                                                  | Yes                                      |
| DS113513:82213-82238:r                     | None                           | Not annotated                                                | No                                       |
| DS113569:18673-18698:r                     | None                           | TVAG_324910                                                  | Yes                                      |
| DS113640:40185-40210:f                     | None                           | Not annotated                                                | No                                       |
| DS113657:12549-12574:f                     | None                           | TVAG_242770                                                  | Yes                                      |
| DS113657:41847-41872:r                     | None                           | Not annotated                                                | No                                       |
| DS113731:31075-31100:f                     | None                           | Not annotated                                                | No                                       |
| DS113785:16501-16526:f                     | None                           | Not annotated                                                | No                                       |
| DS113831:11705-11730:f                     | None                           | Not annotated                                                | No                                       |
| DS113839:34987-35012:f                     | None                           | Not annotated                                                | No                                       |
| DS113956:18734-18759:f                     | None                           | Not annotated                                                | No                                       |
| DS113985:30492-30517:f                     | TvRab1a <sup>a</sup>           | TVAG_383350                                                  | Yes                                      |
| DS114086:5861-5886:f                       | None                           | TVAG_134480                                                  | Yes                                      |
| DS114221:16970-16995:r                     | None                           | TVAG_089630                                                  | Yes                                      |
| DS114306:8464-8489:r                       | None                           | Not annotated                                                | No                                       |
| DS114386:14533-14558:f                     | None                           | Not annotated                                                | No                                       |
| DS114386:16239-16264:f                     | None                           | Not annotated                                                | No                                       |
| DS115898:3348-3373:r                       | None                           | Not annotated                                                | No                                       |
| DS117022:2384-2409:f                       | None                           | Not annotated                                                | No                                       |
| DS117874:2072-2097:r                       | None                           | Not annotated                                                | No                                       |
| DS129582:756-781:f                         | None                           | Not annotated                                                | No                                       |

Notes: <sup>a</sup>The only old segment, previously described [16], is shown with its original name 'TvRab1a'. <sup>b</sup>Segments that are located in protein-coding genes were noted with the TrichDB ID where applicable in this column. <sup>c</sup>This column indicates if introns were experimentally validated as per Additional file 3: Figure S1. <sup>d</sup>This segment (in red) was found in a protein-coding gene (TVAG\_269270, in red) containing an intron B consensus sequence that was not validated as per Additional file 3: Figure S1.
